# Supplementary material for: Enhanced thermoelectric properties of Bi2Te3-based micro-nano fibers via thermal drawing and interfacial engineering
Source: Research Square preprint supplement (doi:10.21203/rs.3.rs-1309115/v1), 2022-02-04
Supplement: Supplementary file 1 [file a9bcf1f4a17a05eafdcdc6d6.docx]

**Supplementary Information**

**Note 1: Error analysis.**

The relative measurement error of  is expressed as:

(S1)

11.34%; 5.48%; 8.55%; 24.85%.

**Note 2: Calculated lattice thermal conductivities.**

The calculations were carried out by using the VASP and the projector augmented-wave method. The Perdew–Burke–Ernzerhof function within the generalized gradient approximation was used to describe the exchange and correlation of electrons. The plane-wave cutoff was set to 350 eV to ensure convergence. The k-point grid in the Brillouin zone was chosen to be 6×6×6 by the Monkhort-Pack scheme for the mesh sampling. The geometric optimization of the lattice was performed by the conjugate gradient method, with the energy convergence tolerance chosen as 10−6eV. Based on second and third-order force-constants given by DFT, the thermal conductivities are derived by solving the Boltzmann transport equations. The mean free path dependence of lattice thermal conductivities of Bi2Te3 at 300 K is shown in Figure S5.

Figure S1. Optical photographs of Bi2Te3 melts on a borosilicate glass sheet at 700 °C in argon atmosphere for (a) 0 hour, (b) 1 hour, (c) 2 hours, (d) 3 hours

Figure S2. cross-section SEM images of (a) the once drawn and (a) the second drawn TE fibers. Side-view SEM images of HF etched (c) micro-scale and (d) micro-nano-scale TE fibers. (e) EDS elemental mapping of a single TE fiber

Figure S3. TEM images of (a-b) diverse dislocations and (c-d) strain distortions at fiber interface

Figure S4. Schematic of the electrical circuit for implementing the self-heating 3*ω* method.

Figure S5. Mean free path dependence of lattice thermal conductivities of Bi2Te3 at 300 K

Figure S6. (a) SEM images of FIB transferring micro-nano fiber core and (b) a

micro-nano fiber core fixed on a testing chip. (c) An optical image of HF etched fiber core arrays and (d) SEM image of the four-probe test for fiber electrical conductivities; Inset: the I-V characteristics corresponding to original state and one or two year state

Figure S7. (a) An optical microscopic image of BSTF in the original flat state; Inset: the I-V characteristics corresponding to the five bending-radius states. (b) The suppleness of an individual BSTF during the bending process

Figure S8 Spatially averaged temperature variation curve of the fiber calculated by the COMSOL software (I0=0.4 mA, *f*=15 Hz)
